# Supplementary material for: Effect of Commercial Yeast Starter Cultures on Cabernet Sauvignon Wine Aroma Compounds and Microbiota
Source: MDPI journal article supplement (doi:10.3390/foods11121725), 2022-06-13
Supplement: s1 [file s1]

Supplementary Table S1

Alpha diversity indices of Fungus.

| Sample | Alpha diversity indices |        |         |         |          |
|--------|-------------------------|--------|---------|---------|----------|
|        | Chao                    | ACE    | Shannon | Simpson | Coverage |
| C0d    | 137.25                  | 135.64 | 2.036   | 0.202   | 0.999    |
| C2d    | 22.50                   | 40.00  | 0.014   | 0.997   | 0.999    |
| C4d    | 24.20                   | 28.45  | 0.014   | 0.997   | 0.999    |
| C6d    | 8.00                    | 10.08  | 0.004   | 0.999   | 0.999    |
| E0d    | 147.61                  | 145.19 | 2.334   | 0.198   | 0.999    |
| E2d    | 41.60                   | 62.60  | 0.047   | 0.989   | 0.999    |
| E4d    | 21.20                   | 23.31  | 0.017   | 0.996   | 0.999    |
| E6d    | 11.00                   | 0      | 0.001   | 0.999   | 0.999    |
| F0d    | 132.37                  | 135.79 | 1.657   | 0.290   | 0.999    |
| F2d    | 106.80                  | 130.78 | 0.337   | 0.889   | 0.999    |
| F4d    | 43.60                   | 70.11  | 0.094   | 0.973   | 0.999    |
| F6d    | 22.25                   | 25.88  | 0.022   | 0.995   | 0.999    |
| S0d    | 121.36                  | 118.08 | 1.436   | 0.334   | 0.999    |
| S2d    | 44.50                   | 67.98  | 0.033   | 0.992   | 0.999    |
| S4d    | 20.00                   | 43.69  | 0.011   | 0.998   | 0.999    |
| S6d    | 30.00                   | 40.72  | 0.005   | 0.999   | 0.999    |

Supplementary Table S2

Alpha diversity indices of bacteria.

| Sample | Alpha diversity indices |        |         |         |          |
|--------|-------------------------|--------|---------|---------|----------|
|        | Chao                    | ACE    | Shannon | Simpson | Coverage |
| C0d    | 244.12                  | 301.10 | 2.80    | 0.121   | 0.993    |
| C2d    | 293.13                  | 363.26 | 2.73    | 0.195   | 0.992    |
| C4d    | 248.12                  | 300.84 | 2.47    | 0.215   | 0.993    |
| C6d    | 251.55                  | 325.96 | 2.16    | 0.316   | 0.992    |
| E0d    | 183.33                  | 281.89 | 2.59    | 0.122   | 0.994    |
| E2d    | 265.04                  | 334.21 | 2.50    | 0.210   | 0.992    |
| E4d    | 323.89                  | 391.44 | 3.29    | 0.074   | 0.991    |
| E6d    | 219.75                  | 244.85 | 2.56    | 0.192   | 0.994    |
| F0d    | 230.00                  | 286.71 | 2.62    | 0.125   | 0.994    |
| F2d    | 270.60                  | 368.32 | 2.88    | 0.112   | 0.992    |
| F4d    | 228.00                  | 335.40 | 2.07    | 0.306   | 0.993    |
| F6d    | 201.56                  | 249.90 | 1.58    | 0.463   | 0.994    |
| S0d    | 280.90                  | 357.83 | 2.82    | 0.107   | 0.992    |
| S2d    | 265.36                  | 317.75 | 2.78    | 0.148   | 0.992    |
| S4d    | 263.66                  | 332.29 | 2.24    | 0.300   | 0.992    |
| S6d    | 278.26                  | 367.62 | 2.42    | 0.213   | 0.992    |

Supplementary Table S3

Semi-quantitative concentration of the volatile compounds (ratio among peak area of volatile compounds and internal standards) produced from the alcohol fermentation by different starters. Data are given as means  $\pm$  SD (n = 3). Values with different letters in the same row are significantly different ( $P < 0.05$ ) from each other. ND: not detected.

|              | Compounds<br>(10 <sup>-5</sup> ) | Odor description<br>[2,29,30]         | Numbered | Starters                       |                                |                                 |                                 |
|--------------|----------------------------------|---------------------------------------|----------|--------------------------------|--------------------------------|---------------------------------|---------------------------------|
|              |                                  |                                       |          | S6d                            | F6d                            | C6d                             | E6d                             |
|              | Hexyl alcohol                    | Herbaceous, grass                     | V01      | 41.51 $\pm$ 1.14 <sup>a</sup>  | 39.46 $\pm$ 1.62 <sup>a</sup>  | 24.24 $\pm$ 2.01 <sup>b</sup>   | 25.77 $\pm$ 0.92 <sup>b</sup>   |
|              | isoamyl alcohol                  | Alcohol, harsh,<br>bitter, banana     | V02      | 501.92 $\pm$ 2.26 <sup>c</sup> | 586.90 $\pm$ 1.82 <sup>b</sup> | 951.86 $\pm$ 24.03 <sup>a</sup> | 377.81 $\pm$ 10.23 <sup>d</sup> |
|              | Benzyl alcohol                   | Almond, flowery                       | V04      | 2.76 $\pm$ 0.12 <sup>c</sup>   | 1.38 $\pm$ 0.30 <sup>d</sup>   | 6.47 $\pm$ 0.49 <sup>a</sup>    | ND                              |
| Alcohol (10) | Phenethyl alcohol                | Flowery-rose, bitter,<br>fruity-peach | V05      | 210.04 $\pm$ 0.10 <sup>d</sup> | 164.13 $\pm$ 1.95 <sup>e</sup> | 719.93 $\pm$ 18.68 <sup>a</sup> | 330.19 $\pm$ 33.01 <sup>b</sup> |
|              | 2-Methyl-1-propanol              | Spirituos, fuel                       | V08      | 15.20 $\pm$ 0.33 <sup>c</sup>  | 30.12 $\pm$ 0.28 <sup>b</sup>  | 55.5 $\pm$ 2.87 <sup>a</sup>    | 14.26 $\pm$ 0.69 <sup>c</sup>   |
|              | n-heptanol                       | Chemical, green                       | V09      | 2.72 $\pm$ 0.27 <sup>a</sup>   | 1.51 $\pm$ 0.17 <sup>b</sup>   | ND                              | ND                              |
|              | 3-Methyl-1-pentanol              | Brandy, dirt, green<br>fruit          | V12      | ND                             | 0.95 $\pm$ 0.24                | ND                              | ND                              |
|              | 1-Octanol                        | Chemical, metal,<br>burnt             | V14      | 3.57 $\pm$ 0.21 <sup>b</sup>   | 3.98 $\pm$ 0.11 <sup>a</sup>   | ND                              | ND                              |

|            |                     |                                 |     |                           |                           |                            |                            |
|------------|---------------------|---------------------------------|-----|---------------------------|---------------------------|----------------------------|----------------------------|
| Ester (14) | <b>Total amount</b> |                                 |     | 777.72±3.23 <sup>cd</sup> | 828.46±5.14 <sup>c</sup>  | 1758.00±43.01 <sup>a</sup> | 748.04±42.74 <sup>d</sup>  |
|            | Hexyl acetate       | Apple, cherry, pear,<br>fmoral  | V18 | 36.15±4.53 <sup>b</sup>   | 30.73±1.39 <sup>b</sup>   | 21.86±1.58 <sup>bc</sup>   | 10.23±2.56 <sup>c</sup>    |
|            | Ethyl caprylate     | Fruity, pineapple,<br>pear      | V19 | 640.87±4.63 <sup>b</sup>  | 422.00±22.21 <sup>d</sup> | 586.00±19.73 <sup>c</sup>  | 265.33±5.28 <sup>e</sup>   |
|            | Ethyl caprate       | Grape, floral                   | V20 | 226.58±5.46 <sup>b</sup>  | 154.59±3.27 <sup>c</sup>  | 235.86±17.63 <sup>b</sup>  | 110.19±0.5133 <sup>d</sup> |
|            | Ethyl laurate       | Leaf                            | V21 | 31.93±2.29 <sup>c</sup>   | 61.32±4.62 <sup>b</sup>   | 21.67±1.95 <sup>d</sup>    | 20.25±3.36 <sup>d</sup>    |
|            | Ethyl caproate      | Apple peel, fruit               | V24 | 238.93±21.98 <sup>a</sup> | 151.37±1.51 <sup>c</sup>  | 143.77±10.08 <sup>c</sup>  | 70.11±3.45 <sup>d</sup>    |
|            | Benzyl acetate      | Flowery-jasmine                 | V25 | ND                        | ND                        | 0.19±0.14                  | ND                         |
|            | Isoamyl acetate     | Fruity, sweet, banana           | V26 | 160.91±1.84 <sup>b</sup>  | 167.13±4.72 <sup>b</sup>  | ND                         | 65.48±0.78 <sup>c</sup>    |
|            | Ethyl acetate       | Pineapple, fruity               | V27 | 76.17±9.43 <sup>a</sup>   | 74.77±2.28 <sup>a</sup>   | ND                         | ND                         |
|            | Ethyl nonanoate     | Floral, fruity                  | V31 | ND                        | ND                        | ND                         | 0.98±0.17                  |
|            | Ethyl 9-decenoate   | Rose, Green, fruity,<br>fatty   | V32 | 39.19±1.49 <sup>a</sup>   | 22.42±2.81 <sup>a</sup>   | 4.38±0.31 <sup>a</sup>     | 6.76±0.76 <sup>a</sup>     |
|            | Phenethyl acetate   | Apple, cherry, pear,<br>fmoral1 | V33 | 25.27±3.74 <sup>c</sup>   | 27.07±3.05 <sup>c</sup>   | 73.41±6.53 <sup>a</sup>    | 15.83±0.62 <sup>d</sup>    |

|           |                         |                                         |     |                            |                            |                            |                           |
|-----------|-------------------------|-----------------------------------------|-----|----------------------------|----------------------------|----------------------------|---------------------------|
| Acid (5)  | Ethyl butyrate          | Pineapple, yellow passion fruit         | V34 | 16.16±1.11 <sup>a</sup>    | 7.05±0.7 <sup>b</sup>      | 4.42±1.46 <sup>c</sup>     | 2.11±0.63 <sup>d</sup>    |
|           | Isopentyl hexanoate     | Apple, pineapple                        | V36 | ND                         | ND                         | 233.84±9.31 <sup>a</sup>   | ND                        |
|           | <b>Total amount</b>     |                                         |     | 1492.53±42.00 <sup>b</sup> | 1118.46±36.75 <sup>d</sup> | 1325.40±68.71 <sup>c</sup> | 567.27±16.54 <sup>e</sup> |
|           | Octanoic acid           | Sweat, cheese                           | V52 | 28.24±2.39 <sup>ab</sup>   | 31.24±2.12 <sup>a</sup>    | 22.17±2.99 <sup>c</sup>    | 8.13±0.80 <sup>d</sup>    |
|           | Decanoic acid           | Rancid, fat                             | V53 | 28.39±0.98 <sup>a</sup>    | 15.79±1.36 <sup>b</sup>    | 6.41±2.45 <sup>c</sup>     | ND                        |
|           | Acetic acid             | Sour                                    | V55 | ND                         | 1.43±0.45                  | ND                         | ND                        |
|           | trans-2-Hexenoic acid   | Pineapple, hawthorn, strawberry, cheese | V54 | 1.47±0.39                  | ND                         | ND                         | ND                        |
|           | Stearic acid            | Fat                                     | V58 | ND                         | 4.02±0.28                  | ND                         | ND                        |
|           | <b>Total amount</b>     |                                         |     | 58.11±1.07 <sup>a</sup>    | 52.49±4.06 <sup>a</sup>    | 28.59±5.44 <sup>b</sup>    | 8.13±0.80 <sup>c</sup>    |
|           | Benzaldehyde            | Almond, burnt sugar                     | V45 | ND                         | 1.86±0.69                  | ND                         | ND                        |
| others(4) | 2,4-Di-tert-butylphenol |                                         | V49 | 5.12±1.43 <sup>a</sup>     | 6.69±1.03 <sup>a</sup>     | ND                         | ND                        |
|           | Styrene                 | Balsamic, gasoline                      | V50 | 6.33±1.15 <sup>a</sup>     | 7.05±0.96 <sup>a</sup>     | 4.87±0.17 <sup>b</sup>     | 4.80±0.24 <sup>b</sup>    |
|           | <b>Total amount</b>     |                                         |     | 11.45±0.29 <sup>b</sup>    | 15.61±2.66 <sup>a</sup>    | 4.87±0.17 <sup>c</sup>     | 4.80±0.24 <sup>c</sup>    |
