# Supplementary material for: Effect of Commercial Yeast Starter Cultures on Cabernet Sauvignon Wine Aroma Compounds and Microbiota
Source: MDPI journal article supplement (doi:10.3390/foods11121725), 2022-06-13
Supplement: s1 [file s1]

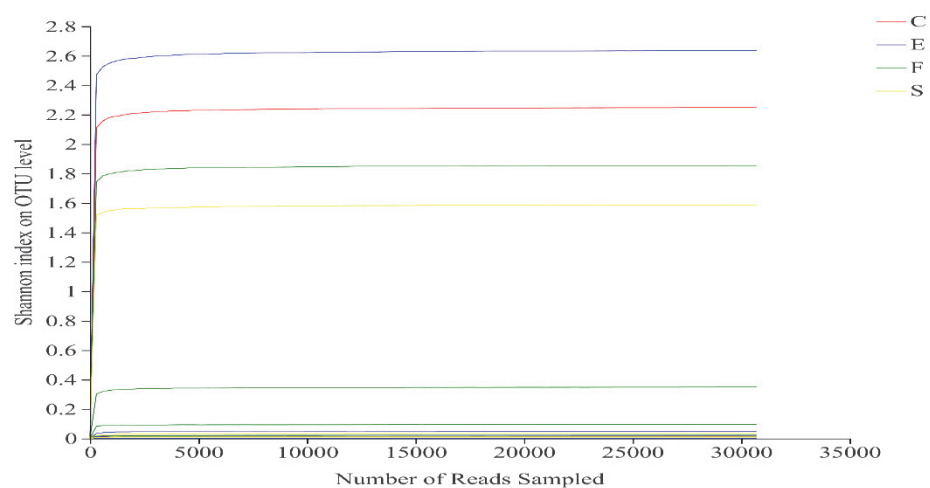

Supplementary Figure S1. Dilution curve of Shannon index of fungi on OTU level. C: CECA; E: CEC01; F: F15; S: 796.

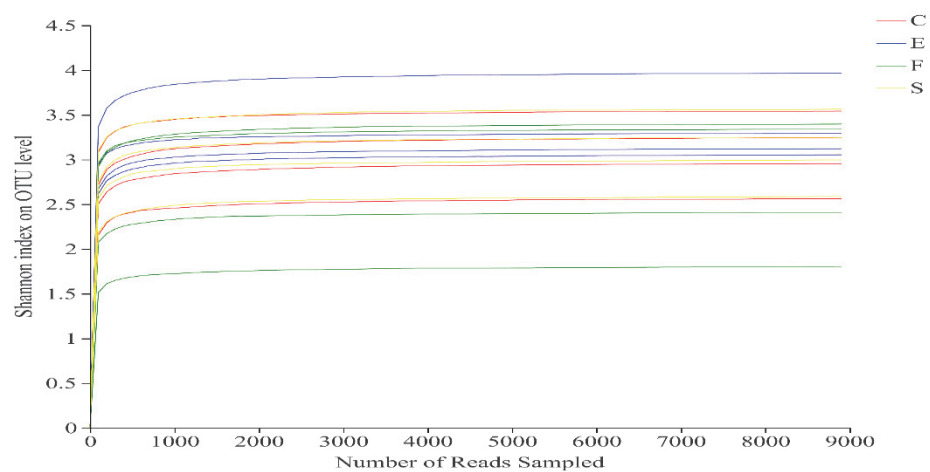

Supplementary Figure S2. Dilution curve of Shannon index of bacteria on OTU level. C: CECA; E: CEC01; F: F15; S: 796.
